# Supplementary material for: Role of ambient ammonia in particulate ammonium formation at a rural site in the North China Plain
Source: Copernicus journal article supplement (doi:10.5194/acp-2017-174), 2017-04-26
Supplement: Supplementary file [file acp-2017-174-AC4-supplement.pdf]

## **Response to comments by editor and anonymous reviewers**

We appreciate the editor and anonymous reviewers' comments and helpful suggestions. We have revised the manuscript according to their comments and suggestions. We hope the revised manuscript can meet the quality requirements of *Atmospheric Chemistry and Physics*.

## **Response to Reviewer #2's comments**

### **Anonymous Reviewer #2**

**Received and published: 31 May 2017**

**This manuscript presents a comprehensive ambient measurement dataset, including various trace gases and particulate species, for over four months at a rural site in the North China Plain (NCP). Ammonia (NH<sub>3</sub>) is the focus of this study for its role in the formation of secondary inorganic aerosols, which accounts for a major fraction of PM<sub>2.5</sub> in NCP. The hourly resolution, higher than many of the previous ambient ammonia measurements, enables detailed studies on individual pollution events and the diurnal variations. However, I hope the authors can take better advantage of this dataset, and go deeper into Atmospheric Chemistry and Atmospheric Physics, as indicated by the journal name. For example, this work aims to understand the impact of ammonia on secondary ammonium aerosols (page 1, line 20), facilitate developing future ammonia emission control policies (page 1, line 32), and examine the sources of ammonia and ammonium and their chemical conversion mechanism (page 3, line 8). These are all important issues, but I am not convinced that this article has advanced our current knowledge and understanding about these issues after reading it.**

**Answer:** We thank your comments and suggestions. We have made additional data analysis and revised the manuscript according to the comments and suggestions by both reviewers. To gain more insight into the role of ammonia in the formation of secondary inorganic aerosol, simulations were made using the thermodynamic equilibrium model ISORROPIA II. The measurements were used as input of model to simulate the variations of the components in gas, liquid and solid phases, which are useful in the investigation of the gas-aerosol equilibrium characteristics.

## **Major comments**

**1. It takes a significant part of this manuscript to explain the observed concentrations. However many of the explanations are qualitative and even speculative. Further quantitative evidences are needed. To name a few:**

**Page 8, lines 5-6, “the monthly concentration of SO<sub>2</sub>, NO<sub>x</sub>, and CO in July and August decreased because of rapid photochemical reduction, additional removal by rainfall, and excellent vertical mixing.” What are the evidences of photochemistry, wet scavenging, and vertical mixing?**

**Answer:** We have added the analysis of some related meteorological conditions and show figures with measurements of rainfall and the NO<sub>2</sub> photolysis frequency (*J*NO<sub>2</sub>) during June-August 2013 as supplementary materials. Changes are made to text as follows:

"The monthly concentrations of SO<sub>2</sub>, NO<sub>x</sub>, and CO in July and August decreased compared to those in June. In addition to less influences from biomass burning, meteorological conditions were also in favor

of lowering the concentrations of these gases. Figure S2 shows the monthly average diurnal variations of  $j\text{NO}_2$  and the time-series of hourly rainfall during June-August 2013. As can be seen, the average  $j\text{NO}_2$  increased from June to August, indicating better conditions for photochemical reduction in July and August. There was also a slight increase in rainfall from June to August, which may promote removal of the pollutants."

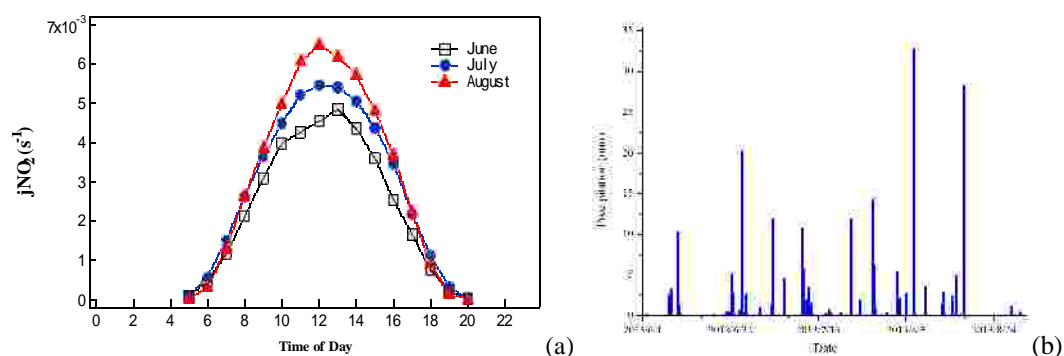

Figure S2. Monthly average diurnal variations of the  $\text{NO}_2$  photolysis frequency ( $j\text{NO}_2$ ) (a) and hourly rainfall (b) observed at Gucheng during June-August 2013.

**Page 8, lines 8-9, the ozone was highest in June because of “photochemical production, intense burning of biomass, and transport of regional pollution”. What are the evidences of more photochemistry, biomass burning, and regional transport in June? Shouldn’t July have larger photochemical rates?**

**Answer:** After careful consideration we think the statement should be revised. The sentence is changed to "For the secondary pollutant  $\text{O}_3$ , the highest concentration was observed in June. This is consistent with previous results from Gucheng (Lin et al., 2009) and should be related with the annual maximum of background  $\text{O}_3$  in the NCP, which occurs in June (Lin et al., 2008; Ding et al., 2008). "

Ding, A. J., Wang, T., Thouret, V., Cammas, J.-P., and Nédélec, P.: Tropospheric ozone climatology over Beijing: analysis of aircraft data from the MOZAIC program, *Atmos. Chem. Phys.*, 8, 1-13, 2008.

Lin, W., Xu, X., Zhang, X., and Tang, J.: Contributions of pollutants from North China Plain to surface ozone at the Shangdianzi GAW Station, *Atmos. Chem. Phys.*, 8, 5889–5898, 2008.

Lin, W., Xu, X., and Zhang, X.: Characteristics of gaseous pollutants at Gucheng, a rural site southwest of Beijing, *J. Geophys. Res.*, 114, 10339, 2009.

**Page 8, lines 26-27, the downward mixing of the residual layer containing higher ammonia concentration could lead to an increase of ammonia in the morning. This would require a very large pool of ammonia in the residual layer. Why did it not happen in other months?**

**Answer:** Indeed, the interpretation about the morning peak is mainly based on the opinions in cited references, which are mostly speculations. We think more investigations are necessary to be able to

clearly and quantitatively explain the morning peak phenomenon. We have revised the 2nd and 3rd paragraphs in section 3.2.2 as follows:

"The morning peak of  $\text{NH}_3$  was also observed elsewhere and could be resulted from emissions from fertilized soils and plant stomata, evaporation of dew, and human sources, as well as mixing down of ammonia from the residual layer (Trebs et al., 2004; Norman et al., 2009; Bash et al., 2010; Ellis et al., 2011). Figure 3b reveals that the relative humidity (90%-89%) and temperature (21.5-22.1°C) remained relatively constant before 06:00, but increased later in the morning. The increasing temperature can heat the earth's surface and vegetation leaves and reduce the RH, potentially leading to evaporation of  $\text{NH}_3$  from soil and plants and volatilization of ammonium aerosol (Trebs et al., 2004; Norman et al., 2009; Ellis et al., 2011), which may increase  $\text{NH}_3$  concentrations in the morning. When the emission was occurring into a shallow boundary layer,  $\text{NH}_3$  increase would be more prominent. In addition, the morning rise might also be due to the breakup of the nocturnal boundary layer. During the sampling period, the majority of peaks of ammonia over 50 ppb occurred at night, which were attribute to local emissions, such as from agricultural activity, into a shallow nocturnal boundary layer. It was supposed by Ellis et al. (2011) that the downward mixing of air containing higher  $\text{NH}_3$  from the residual layer could lead to an increase of surface  $\text{NH}_3$  after the breakup of the nocturnal boundary layer. "

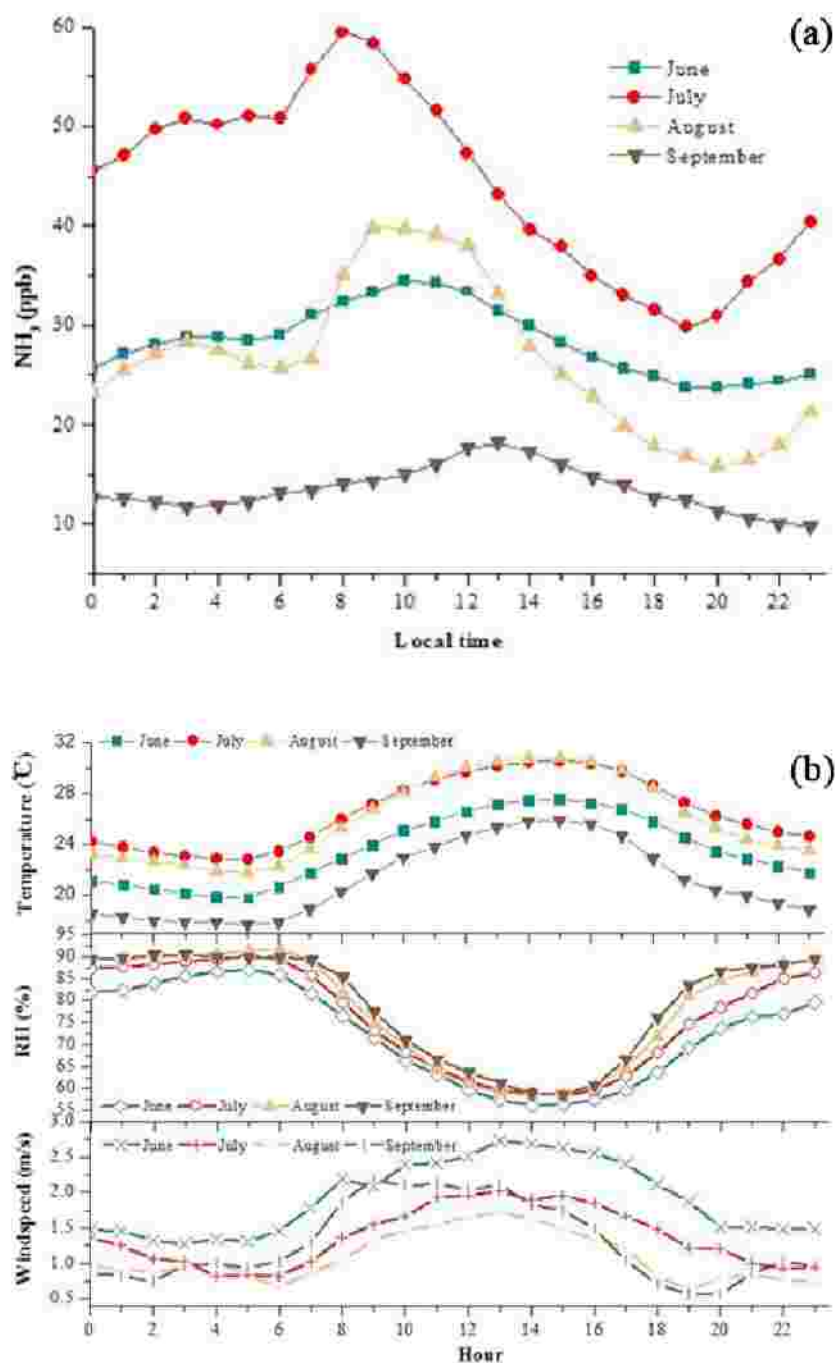

Figure 3. Diurnal variation (a)  $\text{NH}_3$  and (b) meteorological parameters during the sampling period.

Bash, J. O., Walker, J. T., Katul, G. G., Jones, M. R., Nemitz, E., and Robarg, W. P.: Estimation of In-Canopy Ammonia Sources and Sinks in a Fertilized Zea mays Field, *Environ. Sci. Tech.*, 44, 1683-1689, 2010.

Ellis, R. A., Murphy, J. G., Markovic, M. Z., VandenBoer, T. C., Makar, P. A., Brook, J., and Mihele, C.: The influence of gas-particle partitioning and surface-atmosphere exchange on ammonia during BAQS-Met, *Atmos. Chem. Phys.*, 11, 133-145, 2011.

Norman, M., Spirig, C., Wolff, V., Trebs, I., Flechard, C., Wisthaler, A., Schnitzhofer, R., Hansel, A.,

and Neftel, A.: Intercomparison of ammonia measurement techniques at an intensively managed grassland site (Oensingen, Switzerland), *Atmos. Chem. Phys.*, 9, 2635–2645, 2009.

Schwab, J.J.: Ambient Gaseous Ammonia: Evaluation of Continuous Measurement Methods Suitable for Routine Deployment, Final Report Prepared for the New York State Energy Research and Development Authority (NYSERDA) , Final Report 08-15, New York, October 2008.

Trebs, I., Meixner, F. X., Slanina J., Otjes, R. P., and Andreae, M. O.: Real-time measurements of ammonia, acidic trace gases and water-soluble inorganic aerosol species at a rural site in the Amazon Basin, *Atmos. Chem. Phys.*, 4, 967–987, 2004.

**Page 9, line 5, the author explains the earlier ammonia morning peak in July by increased emissions. Further evidence?**

**Answer:** We have no direct evidence of emissions. However, the Gucheng site is an experiment station for agrometeorological studies. Corn is the main crop in the station area and nearly all the agricultural areas in the surrounding. According the climate in the NCP, corn is planted around the middle of June and grows rapidly in July. Therefore, July is the key period for the application of nitrogen fertilizers like urea. For example, during last ten days of July 2013, 225-300 kg of urea were applied per hectare of station area (Meng et al., 2015), causing huge NH<sub>3</sub> spikes during the end of July (Fig. 2). In addition, the highest nighttime temperature in July (Fig. 3b) could promote the soil emission of NH<sub>3</sub> and the relatively lower wind speed (Fig. 3b) and lowest PBLH (Fig. S3) in July was in favor of the accumulation of NH<sub>3</sub> in surface air. We have revised the 4th and 5th paragraphs in section 3.2.2 as follows:

"From Fig. 3a, it can be seen that in July the NH<sub>3</sub> level was the highest and peaked earliest. One reason for this might be the increased emissions of local agricultural NH<sub>3</sub> sources in July compared with those in June, August, and September. On the average, the level NH<sub>3</sub> in July had a maximum nighttime increase (20.0 ppb from 20:00 to 06:00), which is much large than those in June (5.2 ppb), August (9.9 ppb) and September (1.8 ppb). The early morning increase of NH<sub>3</sub> in July started from a much higher level than in other months, resulting a earliest NH<sub>3</sub> peak in July.

There is no direct evidence of increased agricultural NH<sub>3</sub> emission in July. However, the Gucheng site is an experiment station for agrometeorological studies. Corn is the main crop in the station area and nearly all the agricultural areas in the surrounding. According the climate in the NCP, corn is planted around the middle of June and grows rapidly in July. Therefore, July is the key period for the application of nitrogen fertilizers like urea. As mentioned above, the urea application in the station on 20 July 2013 and a precipitation process afterwards caused huge NH<sub>3</sub> spikes during the end of July (Fig. 2b). In addition, the highest nighttime temperature in July (Fig. 3b) could promote the soil emission of NH<sub>3</sub>, and the relatively lower wind speed (Fig. 3b) and lowest PBLH (Fig. S3) in July was in favor of the accumulation of NH<sub>3</sub> in surface air.

In summary, ambient NH<sub>3</sub> at Gucheng showed interesting diurnal cycles, which look significantly different in different summer months. We believe the interplay of some processes, such as emissions from agricultural sources, meteorological conditions (temperature, relativity humidity, wind speed, and BHL height, etc.) as well as chemical conversion are important in the determination of levels and

diurnal patterns of  $\text{NH}_3$  at the site. Whether or not these processes are all important in the morning variation of  $\text{NH}_3$ ? How important are they? And what makes the difference in the peaking time and concentration of  $\text{NH}_3$  in different months? These are questions to be answered in the future."

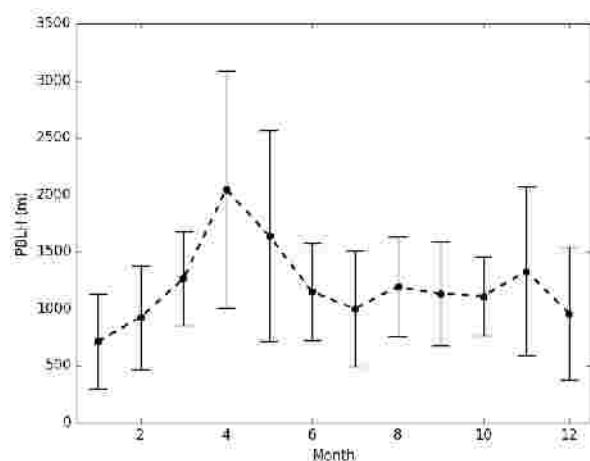

Figure S3. The monthly planetary boundary layer heights at 14:00 during 2013 at Gucheng.

Guo, J., Miao, Y., Zhang, Y., Liu, H., Li, Z., Zhang, W., He, J., Lou, M., Yan, Y., Bian, L., and Zhai, P.: The climatology of planetary boundary layer height in China derived from radiosonde and reanalysis data, *Atmos. Chem. Phys.*, 16, 13309-13319, 2016.

Miao, Y., Guo, J., Liu, S., Liu, H., Li, Z., Zhang, W., and Zhai, P.: Classification of summertime synoptic patterns in Beijing and their associations with boundary layer structure affecting aerosol pollution, *Atmos. Chem. Phys.*, 17, 3097-3110, 2017.

**2. A high observed concentration can always be explained by more emission, less mixing, or less removal. I think a publication in ACP should go beyond reporting the concentrations of these short-lived species, as the concentrations are highly variable. This study used the ratio between ammonium and  $\text{NH}_x$  to infer the gas-particle conversion of ammonia. However the ammonium and ammonia may be from different sources, where ammonium is formed in the city with  $\text{NO}_x$  and  $\text{SO}_2$ , and ammonia is emitted locally. In other words, what if  $\text{NH}_x$  and  $\text{NH}_3$  are decoupled?**

**Answer:** We have made simulations using the ISORROPIA II model and analyzed the model results together measurements. We think we have gained more insight than before but also acknowledge that there are limitations in our observation, modeling and data analysis. Some open issues remain to be addressed in future studies.

The ratios  $\text{NHR}$  ( $\text{NH}_4^+/\text{NH}_x$ ),  $\text{SOR}$  ( $\text{SO}_4^{2-}/(\text{SO}_4^{2-}+\text{SO}_2)$ ) and  $\text{NOR}$  ( $\text{NO}_3^-/(\text{NO}_3^-+\text{NO}_x)$ ) were calculated as measures of chemical conversion of  $\text{NH}_3$ ,  $\text{SO}_2$  and  $\text{NO}_x$ . You are right that  $\text{NH}_x$  and  $\text{NH}_3$  may be decoupled. Sources of  $\text{NH}_3$ ,  $\text{SO}_2$  and  $\text{NO}_x$  may be dislocated. The lifetimes of these gases are different and hence the dispersion areas. Fine aerosol particles may travel much longer than the precursor gases. In the real situation we always observe gases and aerosols originating both from cities and from rural areas, emitted by different sources, and chemically produced. Wherever we measure, we measure is a mixture impacted by different sources from locations and processes. In this sense, we should not attribute our results only to local impacts or local situation. When our observation at a site

covers a longer period, our results should be applicable to areas in varying size.

At page 10, line 13, it is summarized that “This observation emphasizes the important role of NH<sub>3</sub> in the formation of secondary SO<sub>4</sub>, NO<sub>3</sub> and NH<sub>4</sub> aerosols, which should be further explored...”. The title of this manuscript is about the role of ammonia on secondary inorganic aerosols, but what exactly is this role? It is not satisfying to only know it is important and needs further exploration.

**Answer:** We have deleted this sentence. New results from model simulation and data analysis are added and discussed in the revised manuscript. In particular, we have added two new sections:

### **"3.4 Results from thermodynamic equilibrium simulation**

We have used the thermodynamic equilibrium model ISORROPIA II to investigate gas-aerosol partitioning characteristics. NO<sub>3</sub><sup>-</sup>, SO<sub>4</sub><sup>2-</sup> and NH<sub>4</sub><sup>+</sup>. The model outputs include equilibrium NO<sub>3</sub><sup>-</sup>, SO<sub>4</sub><sup>2-</sup>, NH<sub>4</sub><sup>+</sup>, H<sup>+</sup><sub>air</sub>, HNO<sub>3</sub>, NH<sub>3</sub>, AWC, etc. As shown in Fig. 5, the modelled NO<sub>3</sub><sup>-</sup>, SO<sub>4</sub><sup>2-</sup>, NH<sub>3</sub> show excellent correlations with the corresponding measurements, but modelled NH<sub>4</sub><sup>+</sup> is much worse correlated with the measured one. Modelled NO<sub>3</sub><sup>-</sup>, SO<sub>4</sub><sup>2-</sup>, and NH<sub>3</sub> values agree well with the measurements, while the modelled NH<sub>4</sub><sup>+</sup> largely underestimate the measurements. Considering the unbalance between observed NH<sub>4</sub><sup>+</sup> and the sum of observed SO<sub>4</sub><sup>2-</sup>+NO<sub>3</sub><sup>-</sup>+Cl<sup>-</sup>, we can confirm that other acids in aerosol particles are important in the conversion of NH<sub>3</sub> to NH<sub>4</sub><sup>+</sup>. These other acids may be oxalic acid and other dicarboxylic acids. Although we did not measure organic acids in aerosol, the presence of oxalic acid and other low molecular weight dicarboxylic acids in aerosols is often reported (e.g., Hsieh et al., 2007; Kawamura et al., 2010, 2013; Sauerwein and Chan, 2017). There is no doubt about the presence of significant amount of dicarboxylic acids over the North China Plain particularly during summer (Kawamura et al., 2013). Therefore, it is highly possible that neutralizing dicarboxylic acids in aerosol particles contributed significantly to the conversion of ammonia to ammonium.

The simulated HNO<sub>3</sub> concentrations was  $0.9 \pm 1.1 \mu\text{g m}^{-3}$ , showing a maximum value of  $7.41 \mu\text{g m}^{-3}$  at 11:00 on 19 June 2013. The average diurnal variations of HNO<sub>3</sub> and H<sup>+</sup><sub>air</sub> are shown in Fig. S4. The fine particles were moderately acidic in summer, with an average pH values of 3.5. The pH values of aerosol water, estimated based on the simulated results using equation (4), are mostly in the range of 2.5-4.5, with an average of 3.5. On average, pH is over 3.5 during nighttime and below 3.5 during daytime (Fig. 6). Under the medium acidic conditions and high NH<sub>3</sub> concentrations, organic acid like diacids are able to reaction with ammonia to form ammonium. Because we used ISORROPIA-II for inorganic aerosol composition and no organic acids measurements are available, we cannot analyze in detail the role of organic acids though the model performed quite well (Fig. S5). "

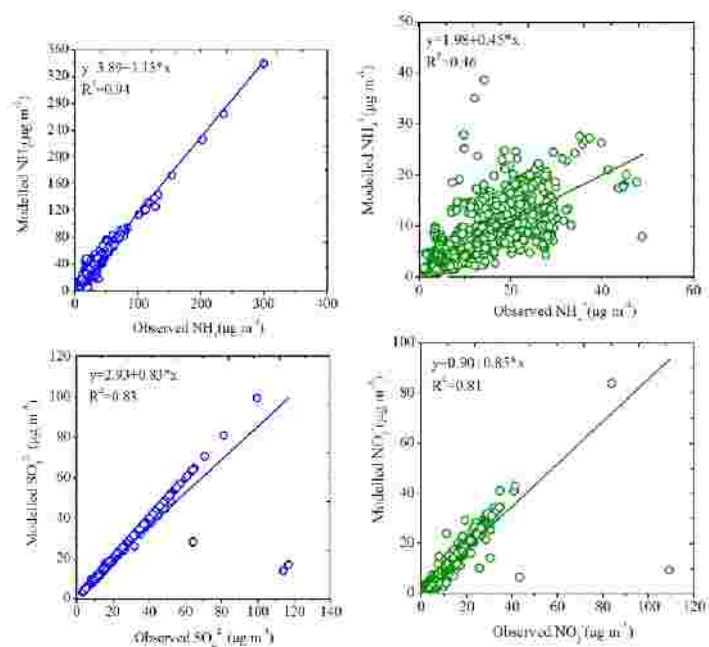

Figure 5. Observed and modelled concentrations of  $\text{NH}_3$ ,  $\text{NH}_4^+$ ,  $\text{SO}_4^{2-}$  and  $\text{NO}_3^-$  in summer 2013.

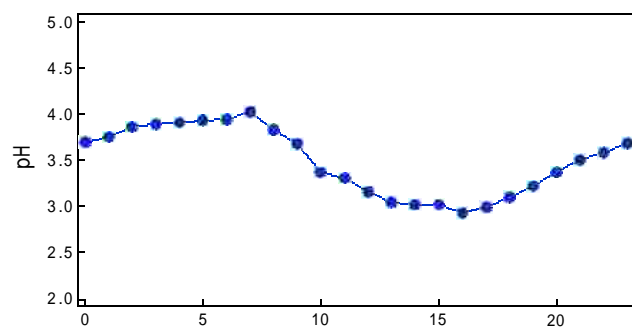

Figure 6. Calculated diurnal variation of pH value of aerosol water.

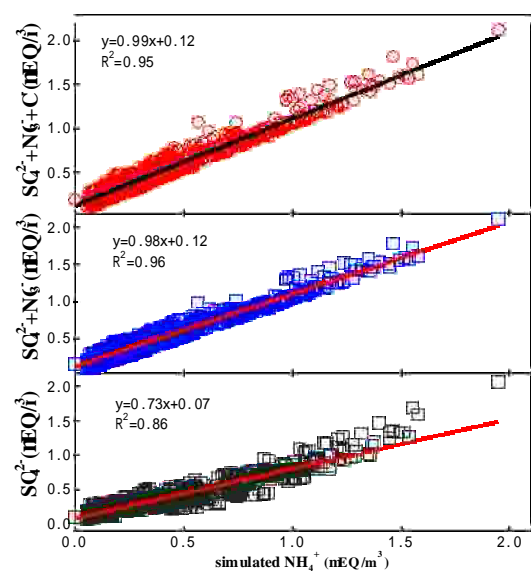

Figure S5 Correlation of modelled  $\text{NH}_4^+$  with modelled  $\text{SO}_4^{2-}$ ,  $\text{SO}_4^{2-} + \text{NO}_3^-$  and  $\text{SO}_4^{2-} + \text{NO}_3^- + \text{Cl}^-$ .



### "3.6 A case study of a pollution period

On several days during the study period, very high  $\text{NH}_3$  and inorganic  $\text{PM}_{2.5}$  concentrations were observed. Here make a case study of a pollution period during 7-11 August 2013. Data of gases, major aerosol ions and some key meteorological parameters are presented in Fig. 9. Some other measure and calculated parameters during this period are given in Fig. S6. As shown in Figs. 9 and S6, there was a sharp increase of  $\text{NO}_x$  during the night and early morning of 10 August, followed by that of  $\text{NH}_3$  (peak value 64 ppb at 03:00. In the meantime, a large peak of AWC occurred and gaseous  $\text{HNO}_3$  decreased to nearly zero (Fig. S6), suggesting rapid uptake of wet aerosol. This event caused the first largest peak of  $[\text{SO}_4^{2-}] + [\text{NO}_3^-] + [\text{NH}_4^+]$ . After this event  $\text{NH}_3$  rose again and reached a even higher peak (76.3) shortly before noon of 10 August. This peak of  $\text{NH}_3$  coincided with a valley of  $\text{NO}_x$ , but the  $\text{HNO}_3$  level increased and pH value decreased was observed in parallel. A few hours later  $\text{SO}_2$  showed a large peak and the second largest peak of  $[\text{SO}_4^{2-}] + [\text{NO}_3^-] + [\text{NH}_4^+]$  occurred. These data show that high  $\text{NH}_3$  concentration was accompanied by the large increase in concentrations of  $\text{SO}_4^{2-}$ ,  $\text{NO}_3^-$  and  $\text{NH}_4^+$ , confirming that  $\text{NH}_3$  play an important role in PM mass formation and that gas-particle conversion occurred when  $\text{NH}_3$  was available, though  $\text{SO}_4^{2-}$  partitions to the aerosol phase regard less of  $\text{NH}_3$  level (Gong et al., 2013). The secondary ions concentrations had similar temporal distributions with slow accumulation and relatively rapid clearing under favourable meteorological conditions. There were good correlation between  $\text{NH}_3$  with  $\text{NH}_4^+$ ,  $\text{SO}_4^{2-}$  and  $\text{NO}_3^-$  ( $R=0.33$ ,  $0.27$  and  $0.49$ , respectively, with  $P < 0.01$ ). However, there was also situation when high  $\text{NH}_3$  did not associate with high  $[\text{SO}_4^{2-}] + [\text{NO}_3^-] + [\text{NH}_4^+]$ , as indicated by the data around noon of 8 August (Fig. 9). During this case, AWC was extremely low and RH was around 40%. These conditions do not favor heterogeneous reactions.

During 7-11 August 2013, the relationships of the observed  $\text{NH}_4^+$  versus those of  $\text{SO}_4^{2-}$ , the sum of  $\text{SO}_4^{2-}$  and  $\text{NO}_3^-$  and the sum of  $\text{SO}_4^{2-}$ ,  $\text{NO}_3^-$  and  $\text{Cl}^-$  are presented in Fig. 10. It is known that  $(\text{NH}_4)_2\text{SO}_4$  is preferentially formed and the least volatile,  $\text{NH}_4\text{NO}_3$  is relatively volatile, while  $\text{NH}_4\text{Cl}$  is the most volatile.  $\text{NH}_4^+$  is thought to be first associated with  $\text{SO}_4^{2-}$ , afterwards, the excess of  $\text{NH}_4^+$  is with nitrate and chloride (Meng et al., 2015). It is noted that the correlation of  $\text{NH}_4^+$  with the sum of  $\text{SO}_4^{2-}$  and  $\text{NO}_3^-$  ( $R=0.91$ , slope=1.23, with  $P < 0.01$ ) was better than that of  $\text{NH}_4^+$  with  $\text{SO}_4^{2-}$  ( $R=0.80$ , slope=1.65, with  $P < 0.01$ ), suggesting that both  $\text{SO}_4^{2-}$  and  $\text{NO}_3^-$  were associated with  $\text{NH}_4^+$ . As shown in Fig.10, sulfate and nitrate were almost completely neutralized with most of the data above the 1:1 line. A few scattered

data below the 1:1 line may be caused by uncertainties in measurements. Little different was found between the regression slopes of  $\text{NH}_4^+$  with the sum of  $\text{SO}_4^{2-}$  and  $\text{NO}_3^-$  and the sum of  $\text{SO}_4^{2-}$ ,  $\text{NO}_3^-$  and  $\text{Cl}^-$  due to the very low amount of  $\text{NH}_4\text{Cl}$ . In this study, the level of  $\text{NH}_3$  was high enough to neutralize both  $\text{SO}_4^{2-}$  and  $\text{NO}_3^-$ , and likely to be form  $(\text{NH}_4)_2\text{SO}_4$  and  $\text{NH}_4\text{NO}_3$ . In addition to these substances, it is likely that  $\text{NH}_3$  also reacted with oxalic acid and other dicarboxylic acid to form ammonium oxalate and other organic ammonium aerosols, as discussed above."

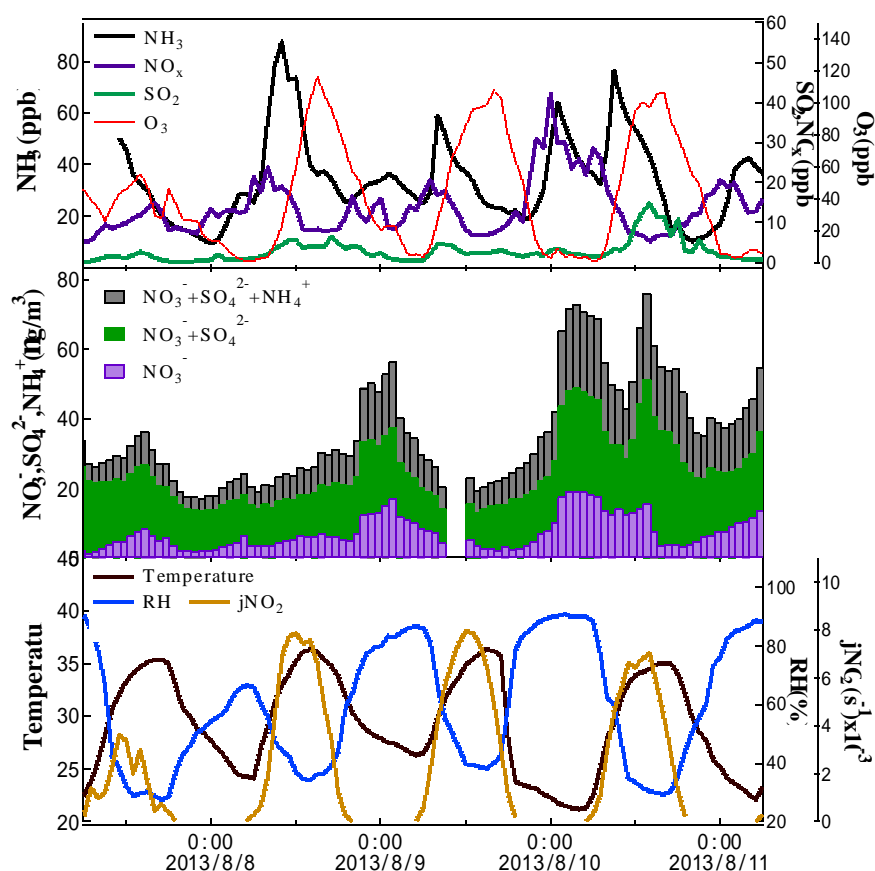

Figure 9. Hourly concentrations of precursor gas and ionic species measured in the pollution episode (a) temporal variations and (b) correlations of  $[\text{NH}_4^+]$  versus  $[\text{SO}_4^{2-}]$ ,  $[\text{SO}_4^{2-}] + [\text{NO}_3^-]$  and  $[\text{SO}_4^{2-}] + [\text{NO}_3^-] + [\text{Cl}^-]$  during 7 –11 August 2013.

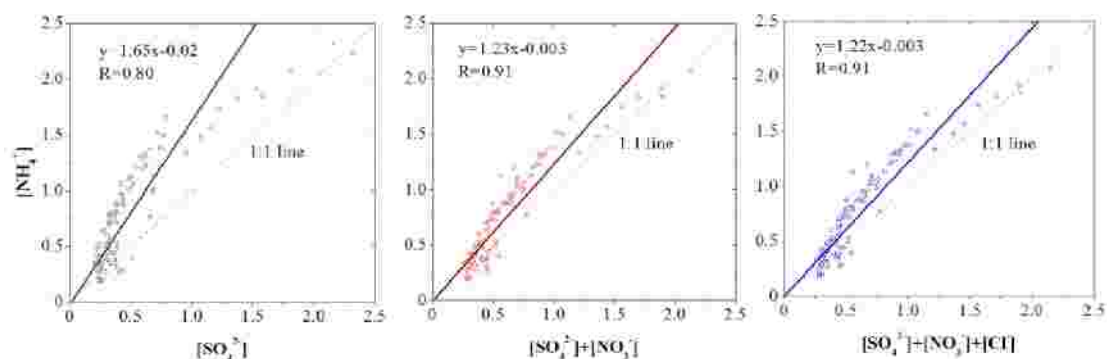

Figure 10. Correlations between  $[\text{NH}_4^+]$  and  $[\text{SO}_4^{2-}]$  (left),  $[\text{NH}_4^+]$  and  $[\text{SO}_4^{2-}] + [\text{NO}_3^-]$  (middle) and  $[\text{NH}_4^+]$  and  $[\text{SO}_4^{2-}] + [\text{NO}_3^-] + [\text{Cl}^-]$  (right) during 7-11 August 2013.

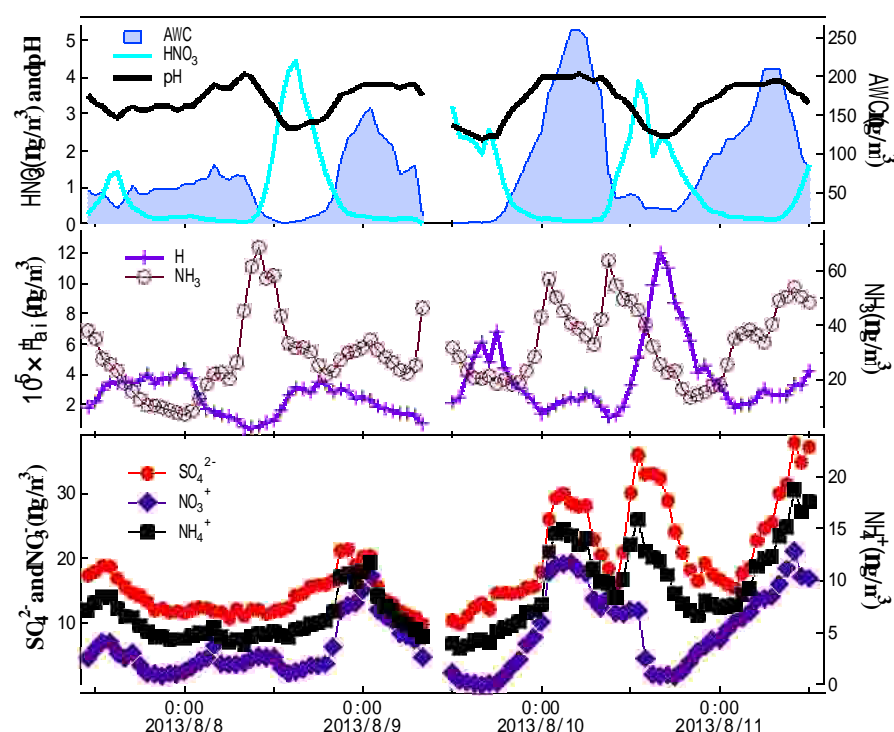

Figure S6. Time series of predicted fine particle pH, predicted particle water mass, predicted  $\text{H}_{\text{air}}^+$  and measured  $\text{NH}_3$  and measured inorganic ions during 7-11 August 2013

### Specific comments

**Page 1, line 29:** please define “transport of air mass from the North China Plain region”, as the site itself is in the middle of NCP.

**Answer:** Yes, the site is located in the middle of NCP. The concentrations of pollutant levels at Gucheng site are not only driven by local sources but also affected by long range transport. We have changed the title of Section 3.5 to "Long range transport and local source of ammonia and ammonium" and revised the text as follows:

"Dependence of the concentrations of  $\text{NH}_3$  on wind direction at Gucheng is studied to get insight into the distribution of local emission sources around the monitoring site. As shown in Fig. 11, during

the sampling period, the prevailing surface winds at Gucheng were northeasterly and southwesterly. High  $\text{NH}_3$  originated from the southwest sector of the measurement site, which may be due to a local unidentified agricultural or industrial source or transport from the Xushui township, which is approximately 15 km away from Gucheng. Lower  $\text{NH}_3$  concentrations were observed under winds from other sectors. Since  $\text{NH}_3$  is either readily converted to  $\text{NH}_4^+$  or subjected to dry deposition, high concentrations are found only close to the surface and near the emission sources. Previous studies have reported an inverse relationship between ground-level concentrations of trace gases, such as ammonia, and wind speed (Robarge et al., 2002; Lin et al., 2011). Thus,  $\text{NH}_3$  concentrations might be generally lower at higher wind speeds because of turbulent diffusion.

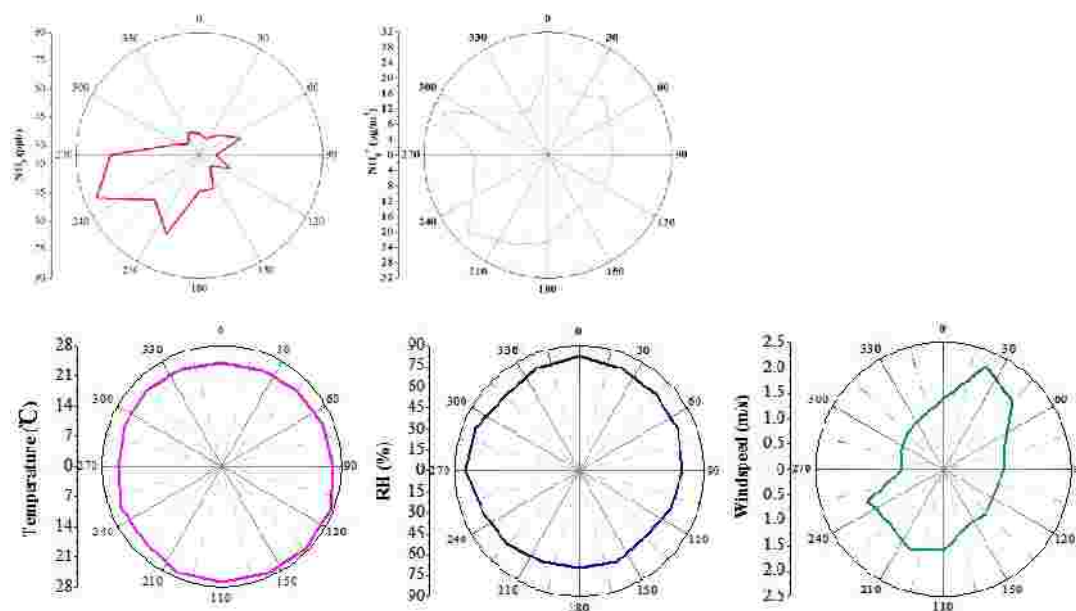

Figure 11. The average  $\text{NH}_3$ ,  $\text{NH}_4^+$  concentrations and meteorological data roses in different wind sectors during summer 2013.”

Lin, W., Xu, X., Ge, B., and Liu, X.: Gaseous pollutants in Beijing urban area during the heating period 2007-2008: variability, sources, meteorological and chemical impacts, *Atmos. Chem. Phys.*, 11, 8157-8170, 2011.

Robarge, W. P., Walker, J. T., McCulloch, R. B., and Murray, G.: Atmospheric concentrations of ammonia and ammonium at an agricultural site in the southeast United States, *Atmos. Environ.*, 36, 16611-1674, 2002.

**Page 3, line 22: how large is the “surrounding area” that impacts the measurements of this site?**

**Answer:** The site is situated in the middle of a large agricultural region with many villages. The information of Gucheng site in details can be found in Lin et al. (2009). According to the maps from Lin et al. (2009) shown below, the Gucheng site is surrounded by farms, dense villages/towns, and the transportation network in the NCP. The accurate size of the surrounding area that really impacts the measurements at Gucheng is not easy to define and varies with meteorological condition, particularly

wind speed. One can do footprint analysis by setting criteria, but this is out of the scope of this paper.

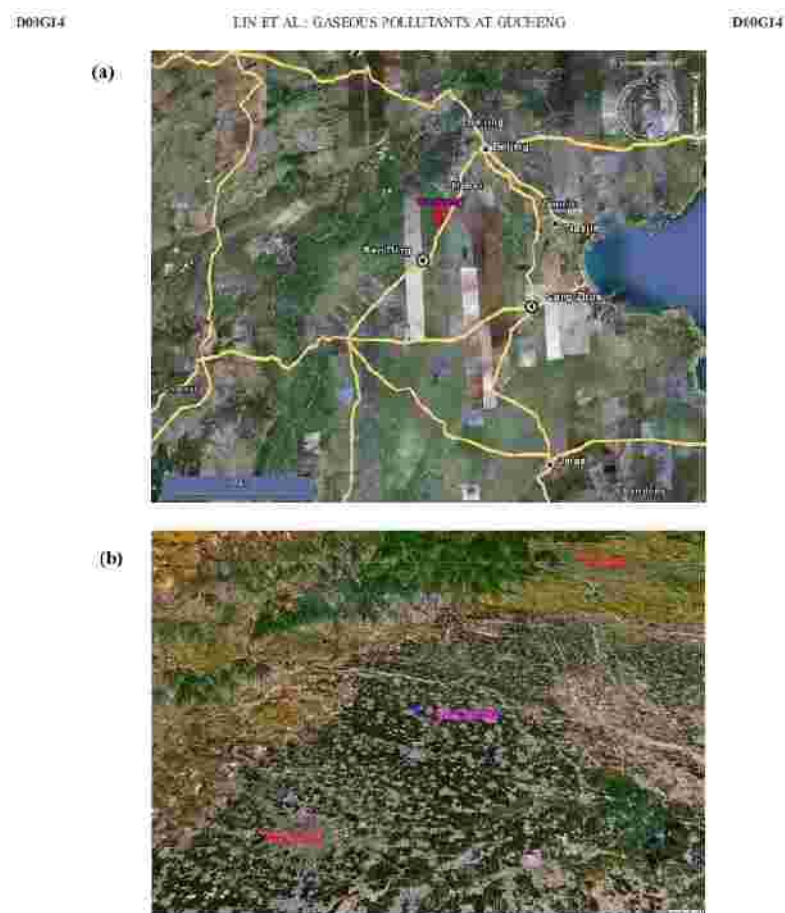

Figure 1. Location of Gucheng site and the topography of the surrounding region (a) from Google Earth imagery (copyright Google Inc., used with permission) and (b) from NASA satellite map (Community Landsat / visible color: <http://worldwind.arc.nasa.gov/>).

## Section 2.2: what's the response time of the Los Gatos instrument? What is the concentration and accuracy of the calibration gas?

**Answer:** We have added information revised the related text as follows:

"Ambient  $\text{NH}_3$  was measured using an ammonia analyzer (DLT-100, Los Gatos Research, USA), which utilize a unique laser absorption technology called Off-Axis Integrated Cavity Output Spectroscopy (OA-ICOS). The analyzer has a precision of 0.2 ppb at 100 sec average and a maximum drift of 0.2 ppb over 24 hrs. The response time of the analyzer is less than 2 s (with optional external N920 vacuum pump). During the campaign,  $\text{NH}_3$  data were recorded as 100-s average. In principle, the  $\text{NH}_3$  analyzer does not need external calibration, because the measured fractional absorption of light at an ammonia resonant wavelength is an absolute measurement of the ammonia density in the cell (Manual of Economical Ammonia Analyzer - Benchtop Model 908-0016, Los Gatos Research). However, we confirmed the good performance of the  $\text{NH}_3$  analyzer using a reference gas mixture  $\text{NH}_3/\text{N}_2$  (Scottgas, USA) traceable to US National Institute for Standards and Technology (NIST). The reference gas of  $\text{NH}_3$  (25.92 ppm with an accuracy of  $\pm 2\%$ ) was diluted to different concentrations using zero air and supplied to the analyzer and a sequence with 5 points of different  $\text{NH}_3$  concentrations (including zero) were repeated for several times to check the performance of the analyzer. As shown in Fig. S1, the analyzer followed rapidly to changes of the  $\text{NH}_3$  concentration,

produced stable response under stabilized  $\text{NH}_3$  concentrations, and repeated accurately (within the uncertainty) the supplied  $\text{NH}_3$  concentrations. The  $\text{NH}_3$  analyzer contains an internal inlet aerosol filter, which was cleaned before our campaign. Nevertheless, some very fine particles can deposit on the mirrors of the ICOS cell, leading to gradual decline in reflectivity. However, slight mirror contamination does not cause errors in  $\text{NH}_3$  measurements because the mirror reflectivity is continually monitored and the measurement is compensated using the mirror ringdown time. Interferences to  $\text{NH}_3$  measurements can be from the sample inlets, for example, due to water condensation or adsorption/desorption effects (e.g., Schwab, 2008; Norman et al., 2009). Such interferences were not quantified but reduced as possibly as we could. PTFE tubing (4.8 mm ID), which is one of the well suited materials for  $\text{NH}_3$  measurement (Norman et al., 2009), was used to induced ambient air. The length of the tubing was kept as short as possible (about 5 m) to limit the residue time to less than 3 s. The aerosol filter at the inlet was changed every two weeks. Water condensation was avoided. Nevertheless, we cannot exclude the influence from the adsorption and desorption, which can also occur on dry surfaces. However, this influence should be small at our site, where the  $\text{NH}_3$  concentration is very high, and cause mainly a lag in the recorded  $\text{NH}_3$  concentration. "

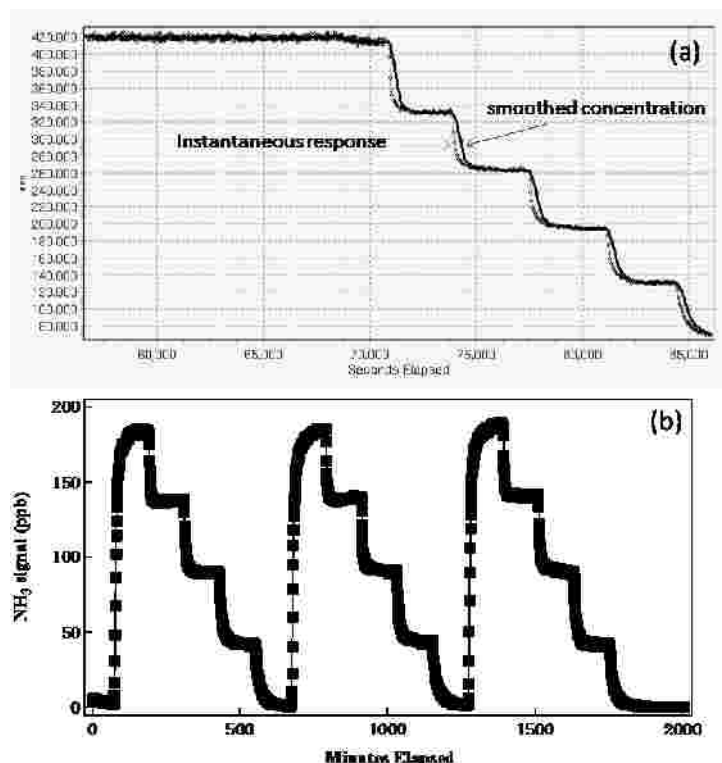

Figure S1 Confirmation of the performance of  $\text{NH}_3$  analyzer using diluted standard gas (mixture  $\text{NH}_3/\text{N}_2$ ). (a) Instrument response to changed  $\text{NH}_3$  concentration and stability; (b) repeated multipoint calibrations.

Norman, M., Spirig, C., Wolff, V., Trebs, I., Flechard, C., Wisthaler, A., Schnitzhofer, R., Hansel, A., and Neftel, A.: Intercomparison of ammonia measurement techniques at an intensively managed grassland site (Oensingen, Switzerland), *Atmos. Chem. Phys.*, 9, 2635–2645, 2009.

Schwab, J.J.: Ambient Gaseous Ammonia: Evaluation of Continuous Measurement Methods Suitable for Routine Deployment, Final Report Prepared for the New York State Energy Research and

**Page 6, line 3: please define “human activity” as it seems a very broad concept.**

**Answer:** We have changed "human activity" to "human excrement and waste disposal".

**Page 6, line 5: there is no “Zhng et al., 2010” in the reference list.**

**Answer:** This was one of the typos. We have corrected it to “Zhang et al., 2010”.

**Page 6, line 8-9: please clarify how can these results “be used in improving NH<sub>3</sub> emission inventory and making future emission control policies”.**

**Answer:** We have revised our expression as follows:

"In recent year a few publications about China's national and regional emission inventories of NH<sub>3</sub> (e.g., Zhou et al., 2015; Xu et al., 2015, 2016; Kang et al., 2016). However, these inventories are based on bottom-up studies, subject to substantial uncertainties in spatial and temporal variations of NH<sub>3</sub> emissions. Ground based observations of NH<sub>3</sub> have been sparse. Our measurements, together with others, can be used for validating and constraining models that use bottom-up inventories, and hence help to reveal potential bias in NH<sub>3</sub> emission inventory."

Kang, K., Liu, M., Song, Y., Huang, X., Yao, H., Cai, X., Zhang, H., Kang, L., Liu, X., Yan, X., He, H., Zhang, Q., Shao, M., and Zhu, T.: High-resolution ammonia emissions inventories in China from 1980 to 2012, *Atmos. Chem. Phys.*, 16, 2043–2058, 2016.

Xu, P., Zhang, Y., Gong, W., Hou, X., Kroeze, C., Gao, W., and Luan, S.: An inventory of the emission of ammonia from agricultural fertilizer application in China for 2010 and its high-resolution spatial distribution, *Atmos. Environ.*, 115, 141-148, 2015.

Xu, P., Liao, Y. J., Lin, Y. H., Zhao, C. X., Yan, C. H., Cao, M. N., Wang, G. S., and Luan, S. J.: High-resolution inventory of ammonia emissions from agricultural fertilizer in China from 1978 to 2008, *Atmos. Chem. Phys.*, 16, 1207–1218, 2016.

Zhou, Y., Cheng, S., Lang, J., Chen, D., Zhao, B., Liu, C., Xu, R., and Li, T.: A comprehensive ammonia emission inventory with high-resolution and its evaluation in the Beijing-Tianjin-Hebei (BTH) region, China, *Atmos. Environ.*, 106, 305-317, 2015.

**Figure 2: I understand ammonia is shown in log scale because its concentration spanned three orders of magnitude. However I suggest add a sub plot with linear scale so that the variability is comparable at different concentration levels and the individual spikes from pollution episodes are clearer.**

**Answer:** Thank you for your suggestion. We have redrawn Figure 2 as shown below:

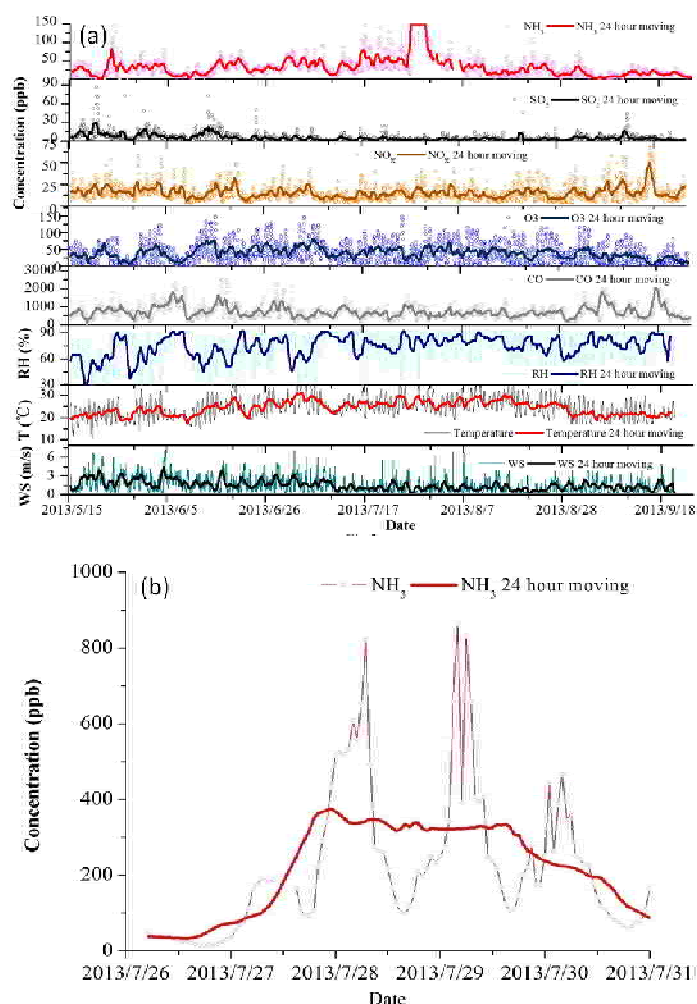

Figure 2. Time series of hourly data of NH<sub>3</sub>, other trace gases and meteorological parameters measured during the sampling period (a) and a blow-up of the period with extremely high NH<sub>3</sub> values during 27-31 July 2013.

**Page 7, line 6: where the urea was applied and how large was the applied area?**

**Answer:** We have added the required information and revised the text as follows:

"The Gucheng station has a farmland of 8.67 hectares. The observation period was in the time of the wheat harvest and corn seeding and growing. Corn was sown and fertilized with about 600 kg of fertilizer per hectare in late June. On 20 July corn was additionally fertilized with 225 to 300 kg of urea per hectare. After this fertilization, there was a raining period. The NH<sub>3</sub> concentration increased rapidly on the seventh day after the urea application on 20 July, peaking during the 27–30 July period (Fig. 2b)."

**Page 7, line 29: what are these “trace gases”?**

**Answer:** We have added "such as NO<sub>x</sub> and CO" at the end of "trace gases" to in our revised version.

**Page 8, lines 14-15 and page 8, lines 30: these two sentences seem contradict each other.**



**Answer:** We have deleted the paragraph there.

**Page 10, line 1: higher NO3 level than what?**

**Answer:** We have deleted this sentence and changed the sentence before to " On the other hand,  $\text{NH}_3$  was more efficient in summer to react with  $\text{SO}_2$  to form  $(\text{NH}_4)_2\text{SO}_4$ . The average concentration of  $\text{NO}_3^-$  in  $\text{PM}_{2.5}$  was  $11.3 \pm 9.1 \mu\text{g m}^{-3}$ . The highest value of  $109.3 \mu\text{g m}^{-3}$  was observed at 14:00 on 22 June 2013 at the highest RH (93%) and AWC ( $910 \mu\text{g m}^{-3}$ )".

**Page 10, line 20-25: I suggest add a figure showing the slope and correlations. The  $\text{SO}_4$  should be normalized with its number of charge. What is the evidence for the existence of  $\text{NH}_4\text{HSO}_4$ ?**

**Answer:** We have added a figure to show the correlations as you suggested and revised the text accordingly.

" During 7-11 August 2013, the relationships of the observed  $\text{NH}_4^+$  versus those of  $\text{SO}_4^{2-}$ , the sum of  $\text{SO}_4^{2-}$  and  $\text{NO}_3^-$  and the sum of  $\text{SO}_4^{2-}$ ,  $\text{NO}_3^-$  and  $\text{Cl}^-$  are presented in Fig. 10. It is known that  $(\text{NH}_4)_2\text{SO}_4$  is preferentially formed and the least volatile,  $\text{NH}_4\text{NO}_3$  is relatively volatile, while  $\text{NH}_4\text{Cl}$  is the most volatile.  $\text{NH}_4^+$  is thought to be first associated with  $\text{SO}_4^{2-}$ , afterwards, the excess of  $\text{NH}_4^+$  is with nitrate and chloride (Meng et al., 2015). It is noted that the correlation of  $\text{NH}_4^+$  with the sum of  $\text{SO}_4^{2-}$  and  $\text{NO}_3^-$  ( $R=0.91$ , slope=1.23, with  $P < 0.01$ ) was better than that of  $\text{NH}_4^+$  with  $\text{SO}_4^{2-}$  ( $R=0.80$ , slope=1.65, with  $P < 0.01$ ), suggesting that both  $\text{SO}_4^{2-}$  and  $\text{NO}_3^-$  were associated with  $\text{NH}_4^+$ . As shown in Fig.10, sulfate and nitrate were almost completely neutralized with most of the data above the 1:1 line. A few scattered data below the 1:1 line may be caused by uncertainties in measurements. Little different was found between the regression slopes of  $\text{NH}_4^+$  with the sum of  $\text{SO}_4^{2-}$  and  $\text{NO}_3^-$  and the sum of  $\text{SO}_4^{2-}$ ,  $\text{NO}_3^-$  and  $\text{Cl}^-$  due to the very low amount of  $\text{NH}_4\text{Cl}$ . In this study, the level of  $\text{NH}_3$  was high enough to neutralize both  $\text{SO}_4^{2-}$  and  $\text{NO}_3^-$ , and likely to be form  $(\text{NH}_4)_2\text{SO}_4$  and  $\text{NH}_4\text{NO}_3$ . In addition to these substances, it is likely that  $\text{NH}_3$  also reacted with oxalic acid and other dicarboxylic acid to form ammonium oxalate and other organic ammonium aerosols, as discussed above."

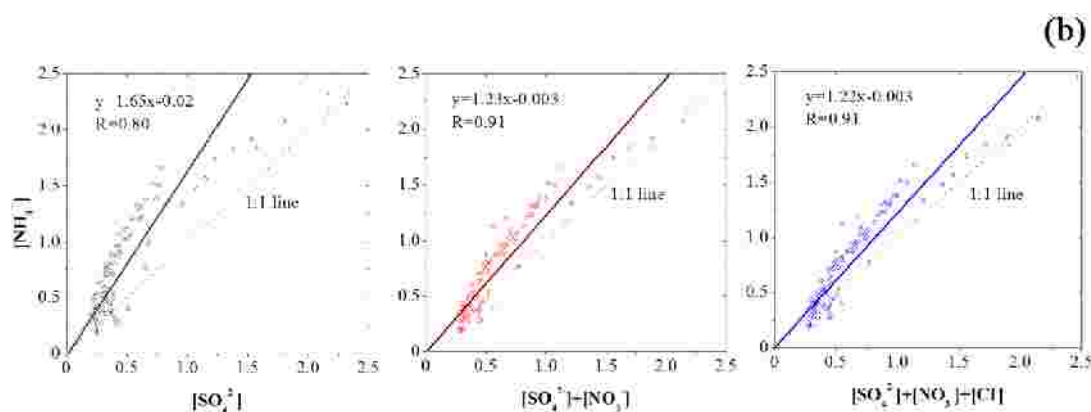

Figure 10. Correlations between  $[\text{NH}_4^+]$  and  $[\text{SO}_4^{2-}]$  (a),  $[\text{NH}_4^+]$  and  $[\text{SO}_4^{2-}] + [\text{NO}_3^-]$  (b) and  $[\text{NH}_4^+]$  and  $[\text{SO}_4^{2-}] + [\text{NO}_3^-] + [\text{Cl}^-]$  (c) during 7-11 August 2013.

Meng, Z. Y., Xie, Y. L., Jia, S. H., Zhang, R., Lin, W. L., Xu, X. B., and Yang W.: The characteristics of atmospheric ammonia at Gucheng, a Rural Site in the North China Plain in summer 2013, J.

applied. meteor. sci., 26, 141-150, 2015. (in Chinese).

**Page 11, line 17: again, it is better to have more evidences showing that NH<sub>3</sub> dry deposition dominates NH<sub>x</sub> deposition.**

**Answer:** This is a speculation. No evidence is available. We have deleted this paragraph.

**Page 12, line 2: where is the reference Meng et al. 2017?**

**Answer:** We have added the reference.

Meng, Z. Y., Lin, W. L., Zhang, R. J., Han, Z. W. and Jiang, X. F.: Summertime ambient ammonia and its effects on ammonium aerosol in urban Beijing, China, Sci. Total Environ., 579, 1521-1530, 2017.
